# Supplementary material
Source: HighWire-hosted journal article supplement (https://emj.bmj.com/content/33/11/776)
Supplement: inline-supplementary-material-1 [file inline-supplementary-material-1.pdf]

Table S1: Descriptive overview for cases of non-traumatic aetiology

| Characteristic                          | Cases of non-traumatic aetiology (n=3436) | Missing Data |
|-----------------------------------------|-------------------------------------------|--------------|
|                                         | (Median (IQR))                            | n (%)        |
| Age in years                            | 68 (55-79)                                | 89 (2.6)     |
| EMS call-response interval*             | 12 (8-19)                                 | 231 (7.1)    |
|                                         | n (%)                                     |              |
| Under 65 years                          | 1387 (40)                                 | 89 (2.6)     |
| Male                                    | 2277 (66)                                 | 4 (0.1)      |
| Presumed Cardiac Aetiology              | 3199 (93)                                 | 0 (0)        |
| Urban Setting                           | 2151 (64)                                 | 81 (2.4)     |
| Public Location                         | 687 (20)                                  | 28 (0.8)     |
| Initial Shockable Rhythm                | 839 (25)                                  | 78 (2.3)     |
| Bystander witnessed                     | 1867 (57)                                 | 132 (3.8)    |
| EMS witnessed                           | 201 (6)                                   | 133 (3.8)    |
| Bystander witnessed and Bystander CPR** | 1280 (70)                                 | 40 (2.1)     |
| Defibrillation attempted                | 1251 (38)                                 | 112 (3.3)    |
| Early defibrillation attempted***       | 290 (24)                                  | 16 (1.3)     |
| EMS CRI eight minutes or less*          | 897 (30)                                  | 231 (7.1)    |
| Outcome                                 |                                           |              |
| ROSC at any stage (n (%))               | 784 (24)                                  | 28 (0.8)     |
| ROSC on arrival at hospital (n (%))     | 554 (17)                                  | 211 (6.1)    |
| Survival to Hospital Discharge          | 214 (6)                                   | 28 (0.8)     |

\*Excludes EMS witnessed cases. Non-trauma cases (n=3235)

\*\*Includes only cases where the collapse was bystander-witnessed. Non-trauma cases (n=1867)

\*\*\*Patients were defined as having received early defibrillation if defibrillation was attempted by a bystander or if the EMS call-response interval was five minutes or less. Includes only cases where defibrillation reported as attempted. Non-trauma cases (n=1251)

Abbreviations: EMS, emergency medical services; CPR, cardiopulmonary resuscitation; CRI, call-response interval; ROSC, return of spontaneous circulation.

Table S2: Regression Analysis for subgroup of cases of non-traumatic aetiology\* for the Outcome Survival to Discharge

| Variable                       | Outcome          |              |                               |                               |
|--------------------------------|------------------|--------------|-------------------------------|-------------------------------|
|                                | Survived (n=107) | Died (n=402) | Model 1 <sup>a</sup> (95% CI) | Model 2 <sup>b</sup> (95% CI) |
| Under 65 years                 | 64               | 178          | 1.9 (1.2-2.9)*                | 1.6 (1.0-2.6)                 |
| Male                           | 89               | 311          | 1.4 (0.8-2.5)                 | 1.1 (0.6-2.1)                 |
| Urban Setting                  | 72               | 223          | 1.7 (1.1-2.6)*                | 1.4 (0.8-2.3)                 |
| Public Location                | 71               | 134          | 3.9 (2.5-6.2)*                | 3.1 (1.2-5.0)*                |
| Bystander CPR                  | 96               | 315          | 2.4 (1.2-4.7)*                | 2.4 (1.2-4.9)*                |
| Early defibrillation attempted | 49               | 113          | 2.1 (1.4-3.3)*                | 1.5 (0.9-2.4)                 |
| EMS CRI eight minutes or less  | 48               | 105          | 2.3 (1.5-3.6)*                | 2.3 (1.4-3.7)*                |

<sup>a</sup>Univariate Analysis

<sup>b</sup>Multivariate Analysis

\*Non-traumatic aetiology, aged over 18 years, witnessed arrest, shockable at time of first rhythm analysis.

Abbreviations: CPR, cardiopulmonary resuscitation; EMS, emergency medical services; CRI, call-response interval.

*Table S3: Regression Analysis for Utstein Group for the Outcome Survival to Discharge including results of pooled logistic regression analysis following multiple data imputation*

In order to assess the impact of missing data on the results of logistic regression, for the whole dataset, data was imputed for the following variables: age; EMS call-response interval; gender; urban/rural location; public/private location; initial shockable rhythm; witness status, bystander CPR; Return of Spontaneous Circulation (ROSC) at any stage; ROSC on arrival at hospital and survival to discharge. Thirty imputations were performed, using predictive mean matching, with a specified maximum of twenty iterations. Following imputation, age and call-response interval were re-categorised into dichotomous variables and the variable 'early defibrillation attempted' was derived again, using imputed data. Using only cases that matched the Utstein criteria, logistic regression analysis for the outcome 'survival to discharge' was performed using imputed data. As can be seen from the table below, while odds ratios changed slightly, variables that were significant in the pooled analysis (Model 3) were identical to those found to be significant in the original logistic regression analysis (Model 2).

| Variable                                    | Outcome             |                 | Model 1 <sup>a</sup><br>(95% CI) | Model 2 <sup>b</sup><br>(95% CI) | Model 3 <sup>c</sup><br>(95% CI) |
|---------------------------------------------|---------------------|-----------------|----------------------------------|----------------------------------|----------------------------------|
|                                             | Survived<br>(n=106) | Died<br>(n=396) |                                  |                                  |                                  |
| Under 65 years                              | 63                  | 175             | 1.8 (1.2-2.9)*                   | 1.6 (1.0-2.6)                    | 1.5 (1.0-2.3)                    |
| Male                                        | 88                  | 305             | 1.5 (0.8-2.6)                    | 1.2 (0.6-2.2)                    | 1.1 (0.7-1.9)                    |
| Urban Setting                               | 71                  | 219             | 1.6 (1.0-2.6)*                   | 1.4 (0.9-2.3)                    | 1.5 (0.9-2.3)                    |
| Public Location                             | 70                  | 131             | 3.9 (2.5-6.2)*                   | 3.1 (1.9-5.0)*                   | 3.3 (2.1-5.1)*                   |
| Bystander CPR                               | 95                  | 310             | 2.4 (1.2-4.7)*                   | 2.4 (1.2-4.9)*                   | 2.3 (1.2-4.5)*                   |
| Was shock delivered <sup>c</sup>            | 106                 | 0               | c                                |                                  |                                  |
| Early defibrillation attempted <sup>d</sup> | 48                  | 112             | 2.1 (1.4-3.3)*                   | 1.4 (0.9-2.3)                    | 1.3 (0.8-2.0)                    |
| EMS CRI eight minutes or less               | 47                  | 104             | 2.2 (1.4-3.5)*                   | 2.2 (1.3-3.6)*                   | 2.1 (1.3-3.4)*                   |

<sup>a</sup>Univariate Analysis

<sup>b</sup>Multivariate Analysis

<sup>c</sup>The variable "Was shock delivered" was omitted from analysis as it is a constant i.e. shock delivered to all cases included in the analysis

<sup>d</sup>Patients were defined as having received early defibrillation if defibrillation was attempted by a bystander or if EMS defibrillation was attempted and the call-response interval was five minutes or less.

<sup>e</sup>Results from pooled analysis following multiple data imputation.

\*Statistically significant

Abbreviations: CPR, cardiopulmonary resuscitation; EMS, emergency medical services; CRI, call-response interval
